# Supplementary material for: Central processing of leg proprioception in Drosophila
Source: eLife journal article supplement (doi:10.7554/elife.60299), 2020-12-02

**A** perfusion response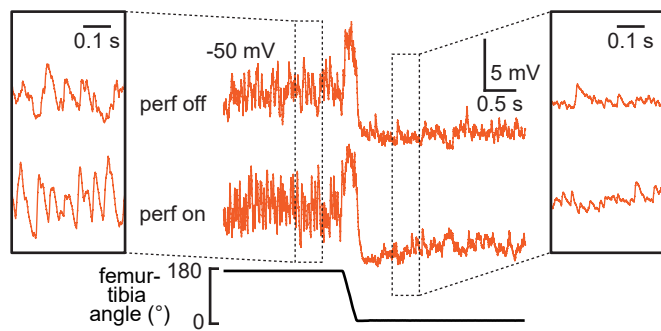**B** swing stimulus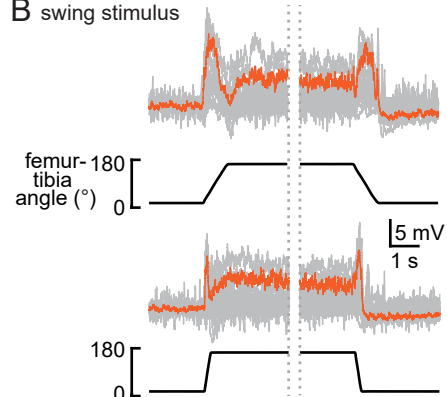**C** ramp-and-hold stimulus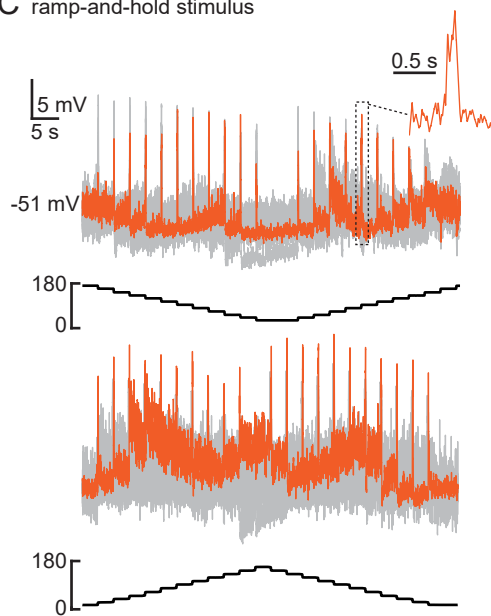**D** TTX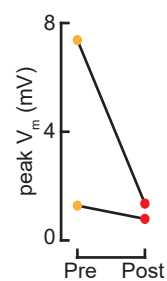**E** MLA n.s.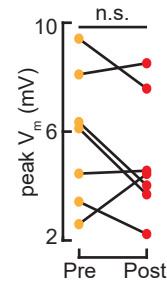**F** atropine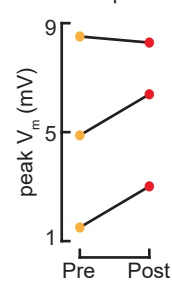**G** picrotoxin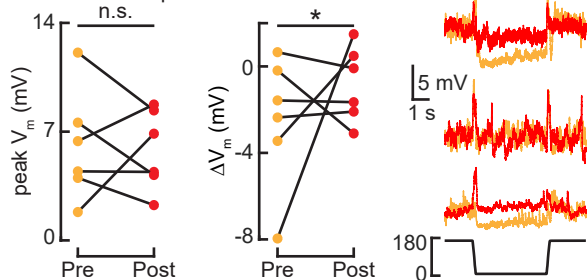**H** 0.1  $\mu$ m, pre and post MLA + atropine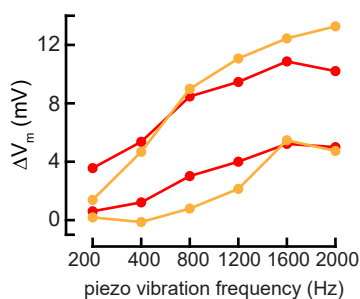**I** 0.1  $\mu$ m, pre and post picrotoxin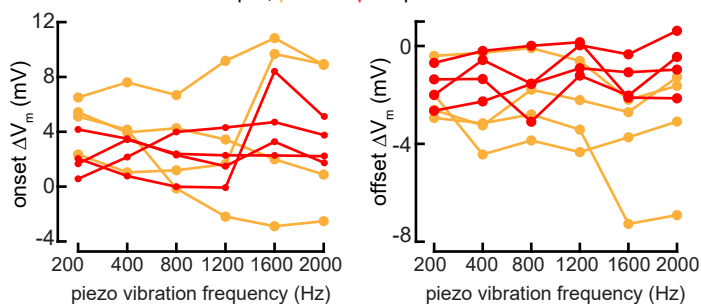

Supplement: supp [file elife_poa_e60299_Figure_7_figure_supplement_1.pdf › elife_poa_e60299_Figure_7_figure_supplement_1.pdf]
