# Supplementary figures and images for: Central processing of leg proprioception in Drosophila
Source: eLife journal article supplement (doi:10.7554/elife.60299), 2020-12-02

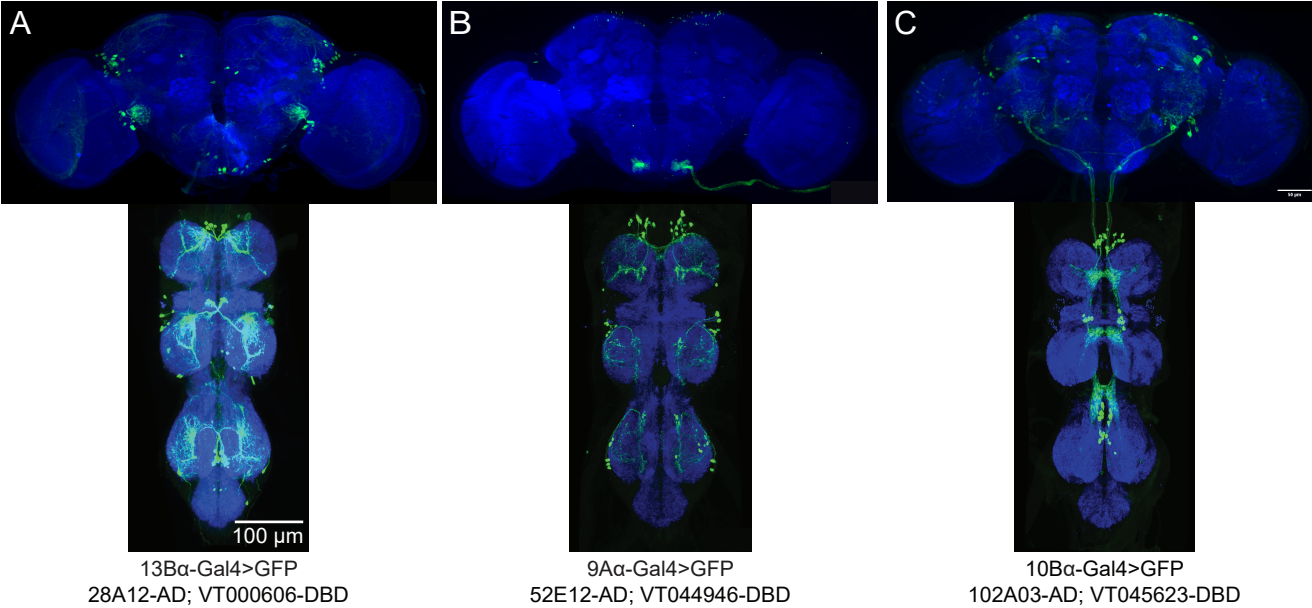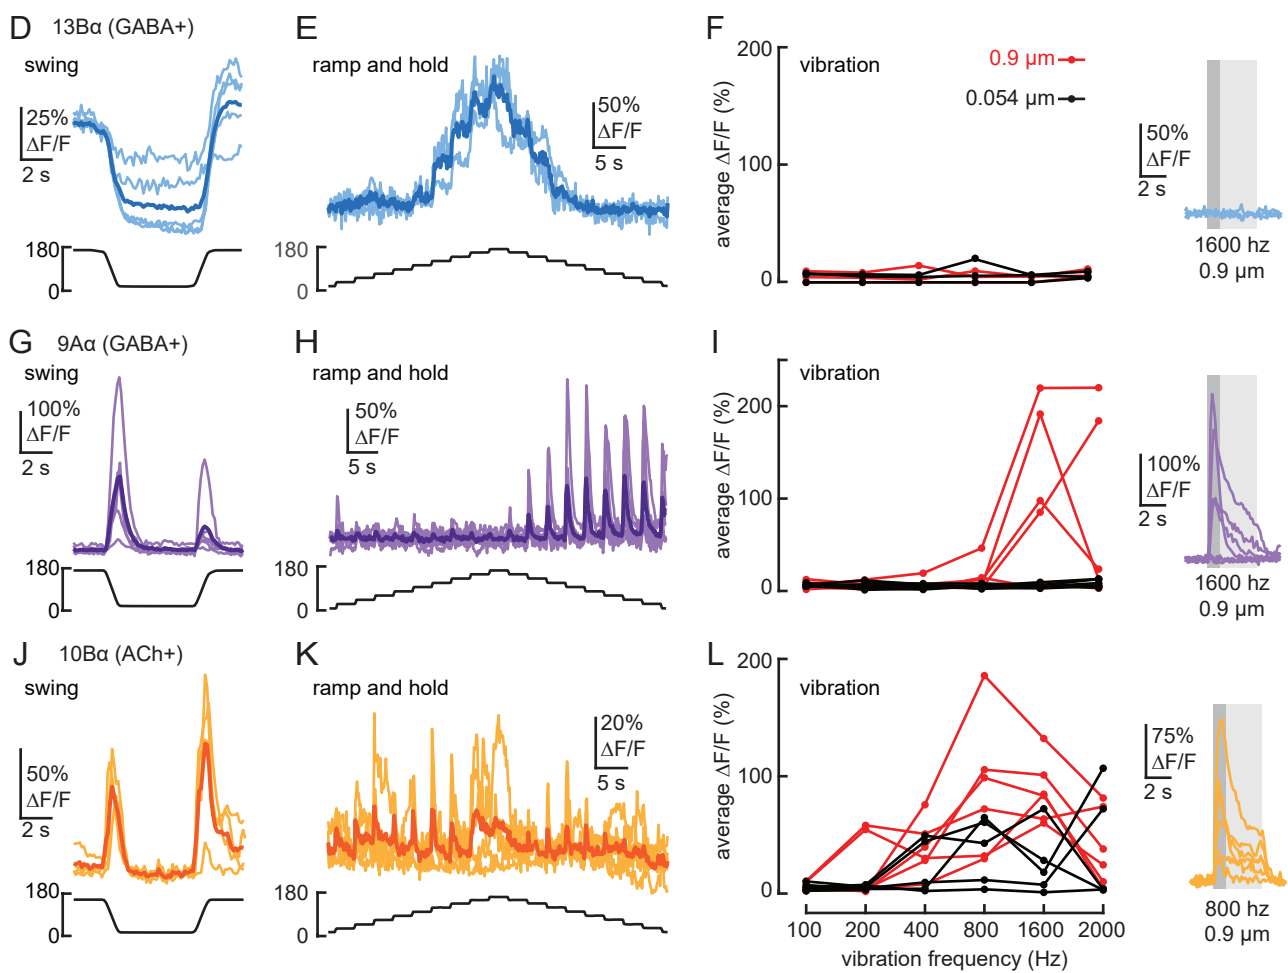

Supplement: supp [file elife_poa_e60299_Figure_1_figure_supplement_1.pdf › elife_poa_e60299_Figure_1_figure_supplement_1.pdf]

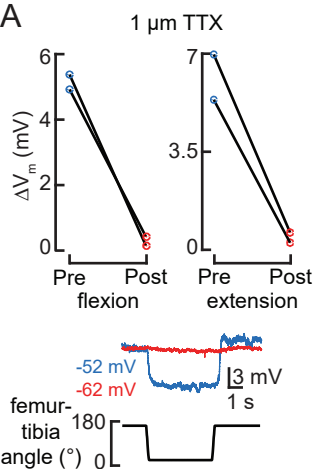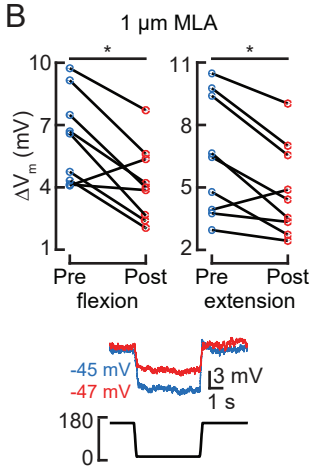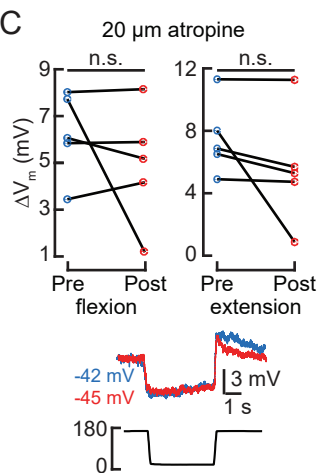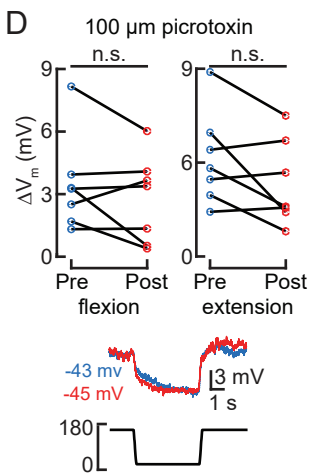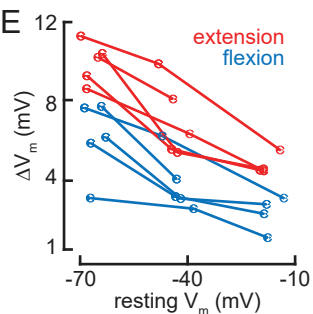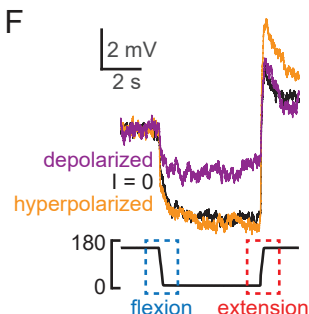

Supplement: supp [file elife_poa_e60299_Figure_2_figure_supplement_1.pdf › elife_poa_e60299_Figure_2_figure_supplement_1.pdf]

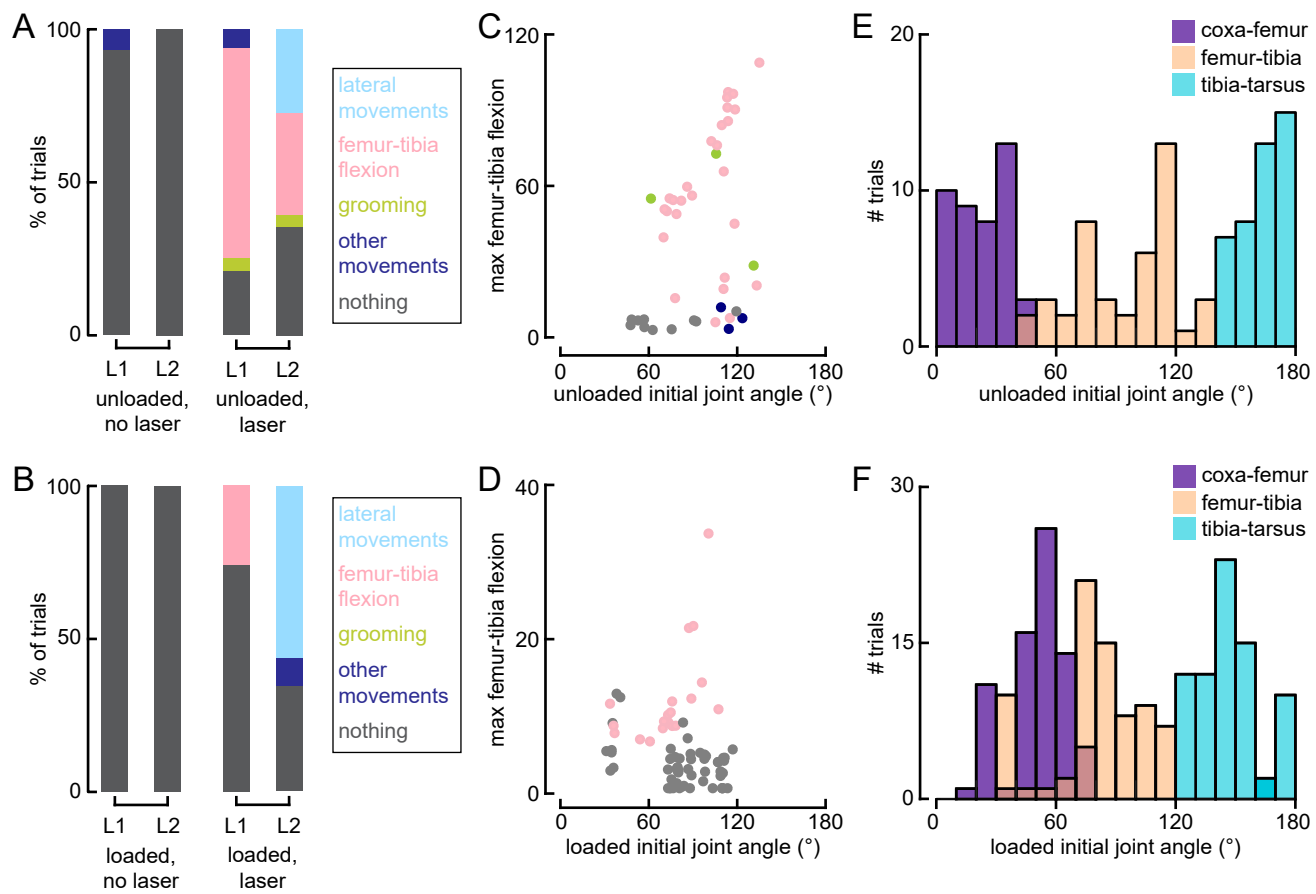

Supplement: supp [file elife_poa_e60299_Figure_3_figure_supplement_1.pdf › elife_poa_e60299_Figure_3_figure_supplement_1.pdf]

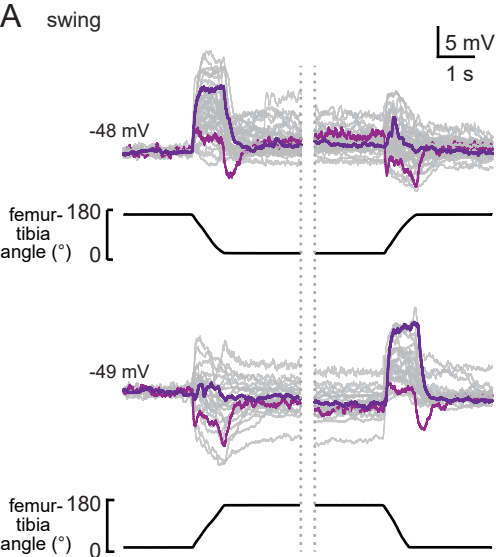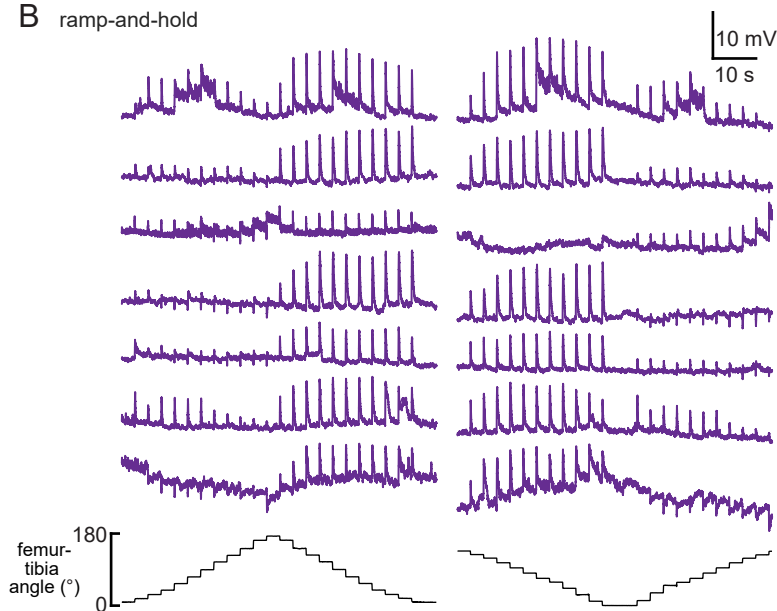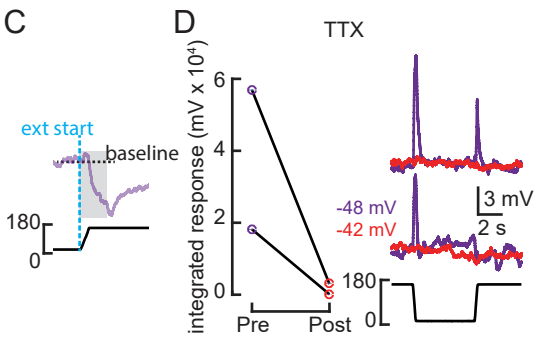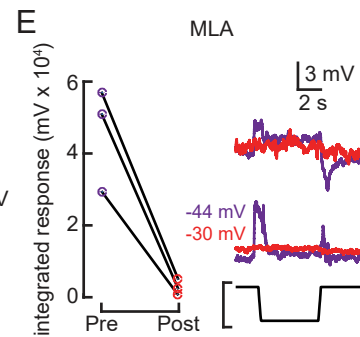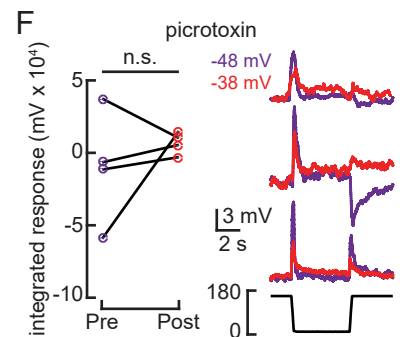

Supplement: supp [file elife_poa_e60299_Figure_4_figure_supplement_1.pdf › elife_poa_e60299_Figure_4_figure_supplement_1.pdf]

**A** swing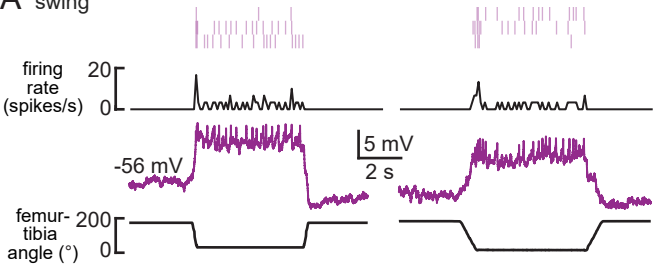**B** ramp-and-hold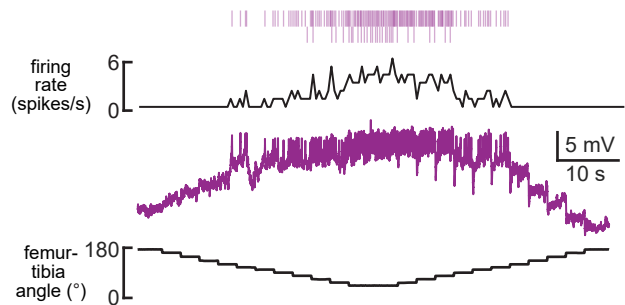**C** 9Aa2 single cell fill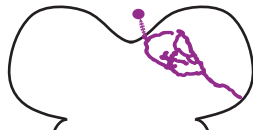**D**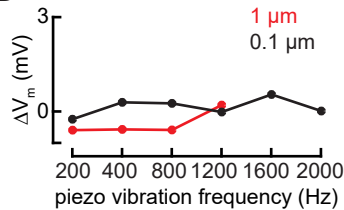**E** swing + MLA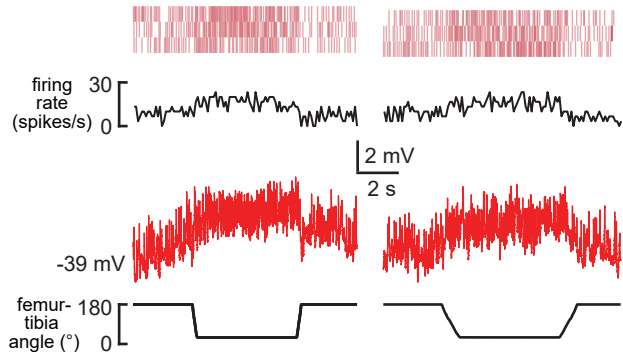

Supplement: supp [file elife_poa_e60299_Figure_5_figure_supplement_1.pdf › elife_poa_e60299_Figure_5_figure_supplement_1.pdf]

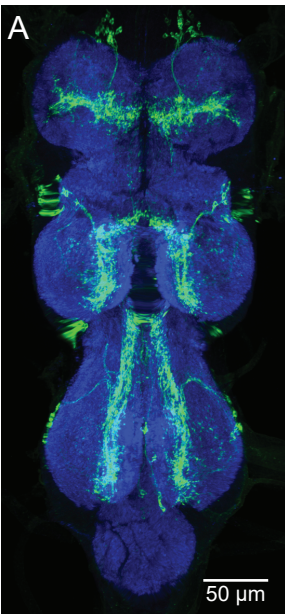

VT014013-AD;30A10-DBD

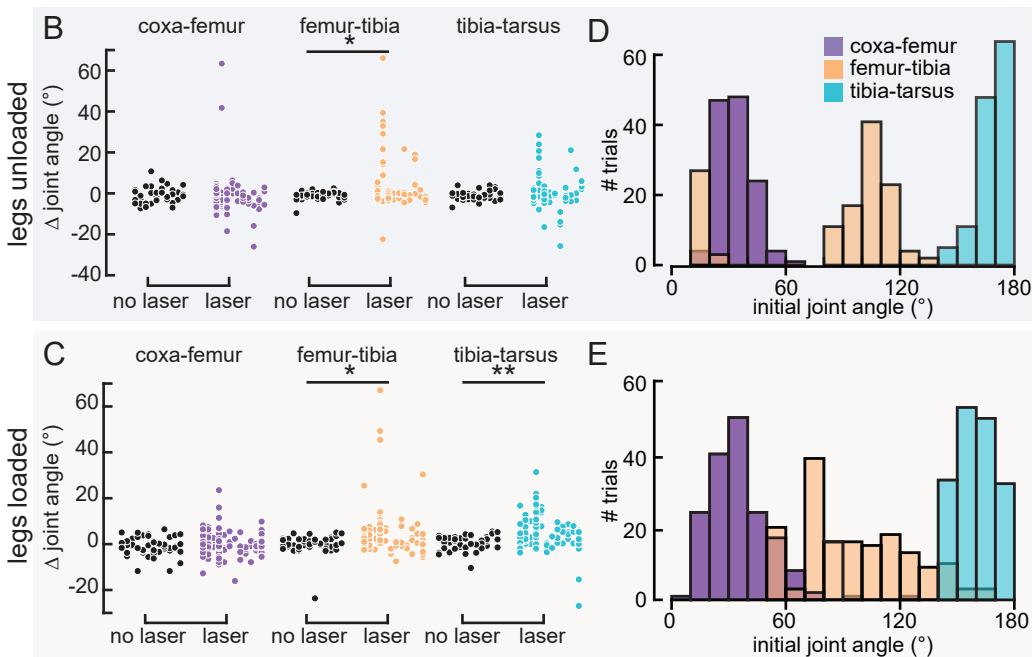

Supplement: supp [file elife_poa_e60299_Figure_6_figure_supplement_1.pdf › elife_poa_e60299_Figure_6_figure_supplement_1.pdf]

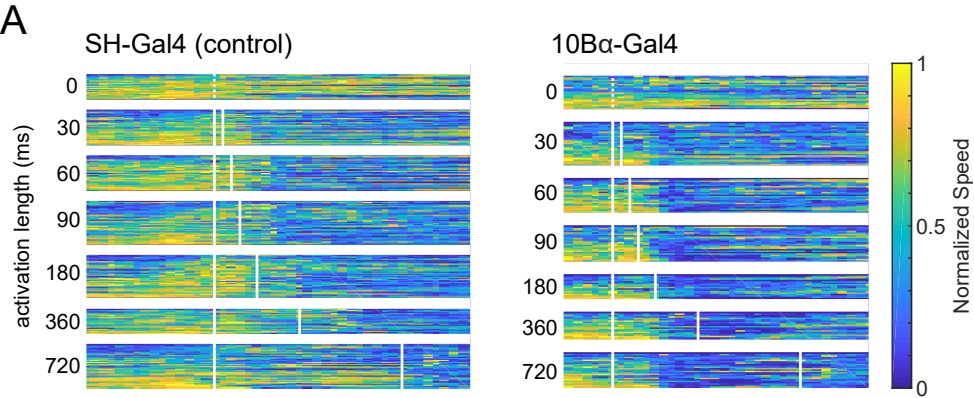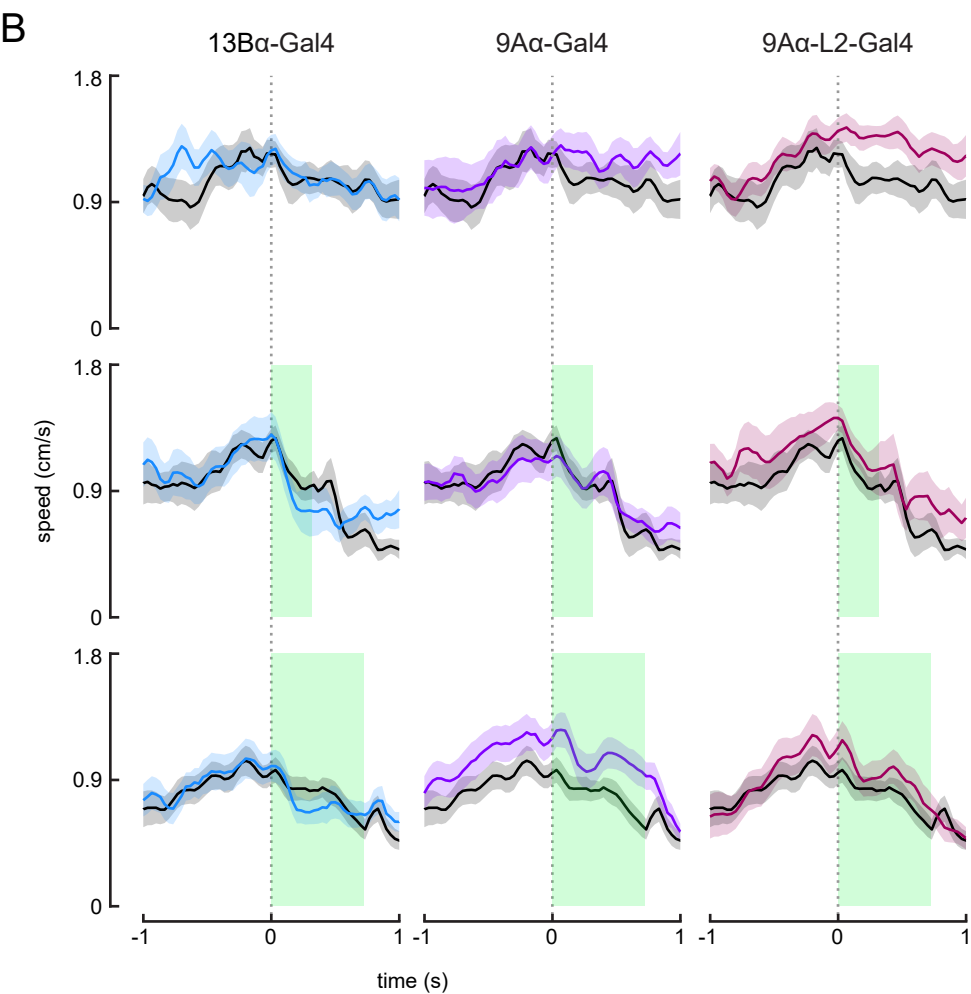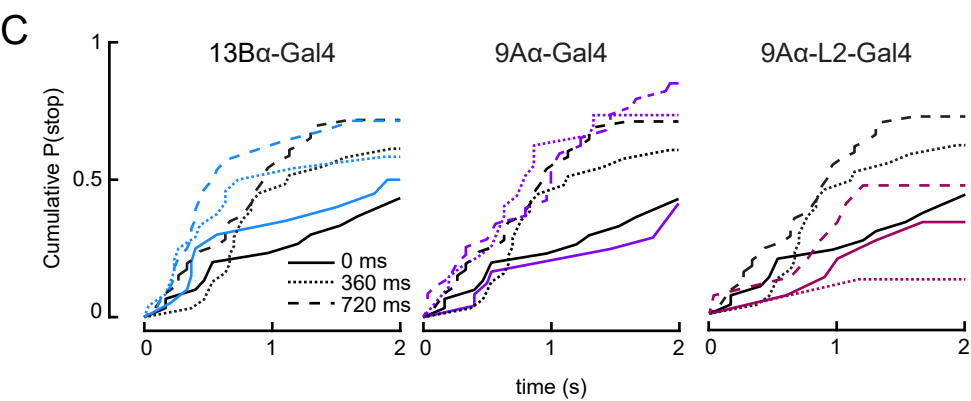

Supplement: supp [file elife_poa_e60299_Figure_8_figure_supplement_1.pdf › elife_poa_e60299_Figure_8_figure_supplement_1.pdf]
